# Supplementary material for: Revisiting Mt Fuji’s groundwater origins with helium, vanadium and environmental DNA tracers
Source: PubMed Central journal article supplement (PMC11041693; doi:10.1038/s44221-022-00001-4), 2023-01-19
Supplement: 44221_2022_1_MOESM2_ESM.pdf [file 44221_2022_1_MOESM2_ESM.pdf]

## Reporting Summary

Nature Portfolio wishes to improve the reproducibility of the work that we publish. This form provides structure for consistency and transparency in reporting. For further information on Nature Portfolio policies, see our [Editorial Policies](#) and the [Editorial Policy Checklist](#).

### Statistics

For all statistical analyses, confirm that the following items are present in the figure legend, table legend, main text, or Methods section.

- | n/a                                 | Confirmed                                                                                                                                                                                                                                                                                      |
|-------------------------------------|------------------------------------------------------------------------------------------------------------------------------------------------------------------------------------------------------------------------------------------------------------------------------------------------|
| <input type="checkbox"/>            | <input checked="" type="checkbox"/> The exact sample size ( $n$ ) for each experimental group/condition, given as a discrete number and unit of measurement                                                                                                                                    |
| <input type="checkbox"/>            | <input checked="" type="checkbox"/> A statement on whether measurements were taken from distinct samples or whether the same sample was measured repeatedly                                                                                                                                    |
| <input checked="" type="checkbox"/> | <input type="checkbox"/> The statistical test(s) used AND whether they are one- or two-sided<br><i>Only common tests should be described solely by name; describe more complex techniques in the Methods section.</i>                                                                          |
| <input type="checkbox"/>            | <input checked="" type="checkbox"/> A description of all covariates tested                                                                                                                                                                                                                     |
| <input type="checkbox"/>            | <input checked="" type="checkbox"/> A description of any assumptions or corrections, such as tests of normality and adjustment for multiple comparisons                                                                                                                                        |
| <input type="checkbox"/>            | <input checked="" type="checkbox"/> A full description of the statistical parameters including central tendency (e.g. means) or other basic estimates (e.g. regression coefficient) AND variation (e.g. standard deviation) or associated estimates of uncertainty (e.g. confidence intervals) |
| <input checked="" type="checkbox"/> | <input type="checkbox"/> For null hypothesis testing, the test statistic (e.g. $F$ , $t$ , $r$ ) with confidence intervals, effect sizes, degrees of freedom and $P$ value noted<br><i>Give <math>P</math> values as exact values whenever suitable.</i>                                       |
| <input checked="" type="checkbox"/> | <input type="checkbox"/> For Bayesian analysis, information on the choice of priors and Markov chain Monte Carlo settings                                                                                                                                                                      |
| <input checked="" type="checkbox"/> | <input type="checkbox"/> For hierarchical and complex designs, identification of the appropriate level for tests and full reporting of outcomes                                                                                                                                                |
| <input checked="" type="checkbox"/> | <input type="checkbox"/> Estimates of effect sizes (e.g. Cohen's $d$ , Pearson's $r$ ), indicating how they were calculated                                                                                                                                                                    |

*Our web collection on [statistics for biologists](#) contains articles on many of the points above.*

### Software and code

Policy information about [availability of computer code](#)

Data collection

Data analysis

For manuscripts utilizing custom algorithms or software that are central to the research but not yet described in published literature, software must be made available to editors and reviewers. We strongly encourage code deposition in a community repository (e.g. GitHub). See the Nature Portfolio [guidelines for submitting code & software](#) for further information.

### Data

Policy information about [availability of data](#)

All manuscripts must include a [data availability statement](#). This statement should provide the following information, where applicable:

- Accession codes, unique identifiers, or web links for publicly available datasets
- A description of any restrictions on data availability
- For clinical datasets or third party data, please ensure that the statement adheres to our [policy](#)

All data used in this study are compiled into Extended Data Tables 1 & 2, which are supplied as supporting information alongside this manuscript and stored on the public data repository HydroShare under doi: 10.4211/hs.4eac370d12e142b5aa718e5deb57da39 (Schilling, et al. 159). The nucleotide sequence datasets obtained in this study were filed in the DNA Databank of Japan (DDBJ) under accession number DRA013474.

## Human research participants

Policy information about [studies involving human research participants and Sex and Gender in Research](#).

|                             |     |
|-----------------------------|-----|
| Reporting on sex and gender | N/A |
| Population characteristics  | N/A |
| Recruitment                 | N/A |
| Ethics oversight            | N/A |

Note that full information on the approval of the study protocol must also be provided in the manuscript.

## Field-specific reporting

Please select the one below that is the best fit for your research. If you are not sure, read the appropriate sections before making your selection.

Life sciences  Behavioural & social sciences  Ecological, evolutionary & environmental sciences

For a reference copy of the document with all sections, see [nature.com/documents/nr-reporting-summary-flat.pdf](https://www.nature.com/documents/nr-reporting-summary-flat.pdf)

## Ecological, evolutionary & environmental sciences study design

All studies must disclose on these points even when the disclosure is negative.

|                                   |                                                                                                                                                                                                                                                                                                                                                                                                                                                                                                                                                                                                                                                                                                                                                                                          |
|-----------------------------------|------------------------------------------------------------------------------------------------------------------------------------------------------------------------------------------------------------------------------------------------------------------------------------------------------------------------------------------------------------------------------------------------------------------------------------------------------------------------------------------------------------------------------------------------------------------------------------------------------------------------------------------------------------------------------------------------------------------------------------------------------------------------------------------|
| Study description                 | Hydrogeological, hydrochemical and microbiological study of the water origins of different springs and groundwater wells within Mt. Fuji watershed based on a combined field and meta study. The study reveals previously unknown and significant deep groundwater circulation and upwelling of deep groundwater into groundwater wells and springs along the Fujikawa Kako fault zone. While classic hydrogeological tracer methods previously employed at Fuji watershed did not reveal this, the combined study of helium, vanadium and eDNA in the different waters around Fuji allowed an unambiguous identification of these deep groundwater water fluxes. The final dataset constructed for the analysis contains approximately 9,500 data points from over 350 different sites. |
| Research sample                   | The analysed data consist of a) field-sampled groundwater physico-chemical and hydrochemical parameters (water temperature, electrical conductivity, pH, major ions concentrations, stable water isotope ratios, dissolved gas concentrations and isotope ratios, trace element concentrations), and b) microbial DNA present in the water samples (i.e., microbial eDNA). As this is a combined field and meta study, detailed information on sampling and sample analysis is provided only for the sampled and analysed field measurements, and information for the data obtained from literature, are provided in the main manuscript.                                                                                                                                                |
| Sampling strategy                 | This is a combined field and meta study. All data that we obtained from our own measurements and that we could find in scientific literature and in other publicly accessible sources were combined into one large dataset. The sampling strategy thus was to obtain as much groundwater and spring water data as possible from as many distributed sites as possible within Mt. Fuji catchment, subject to the constraints given by time, territorial accessibility, funding and personnel.                                                                                                                                                                                                                                                                                             |
| Data collection                   | The database consists of a mix of data obtained from samples taken in the field and analyzed on site and in the laboratory by the authors themselves as well as of data collected from the national hydrological database of Japan, published scientific literature and publicly available data sources (e.g., governmental reports, mineral water company water quality reports, hot spring resorts water quality reports)                                                                                                                                                                                                                                                                                                                                                              |
| Timing and spatial scale          | The data covers samples taken from springs and groundwater wells scattered throughout the entire 100 km <sup>2</sup> Mt. Fuji catchment, spanning a period of 41 years (1979-2020).                                                                                                                                                                                                                                                                                                                                                                                                                                                                                                                                                                                                      |
| Data exclusions                   | No data were excluded                                                                                                                                                                                                                                                                                                                                                                                                                                                                                                                                                                                                                                                                                                                                                                    |
| Reproducibility                   | No laboratory or natural experiments were conducted. All data were sampled directly from the natural environment. The entire database collected and used for this study is given in the Extended data tables 1 + 2, which are supplied alongside the manuscript as well as on the HydroShare repository stated in the data availability statement. All software used is reported in the manuscript, the code availability statement as well as the reporting summary.                                                                                                                                                                                                                                                                                                                    |
| Randomization                     | Not relevant for this environmental study covering data obtained from locations scattered throughout the entire Mt. Fuji catchment.                                                                                                                                                                                                                                                                                                                                                                                                                                                                                                                                                                                                                                                      |
| Blinding                          | Not relevant for this environmental study covering data obtained from locations scattered throughout the entire Mt. Fuji catchment.                                                                                                                                                                                                                                                                                                                                                                                                                                                                                                                                                                                                                                                      |
| Did the study involve field work? | <input checked="" type="checkbox"/> Yes <input type="checkbox"/> No                                                                                                                                                                                                                                                                                                                                                                                                                                                                                                                                                                                                                                                                                                                      |

## Field work, collection and transport

|                        |                                                                                                                                                                                                                                                                                                                                                                                                                                                                                                                                                                                                                                                                                                                |
|------------------------|----------------------------------------------------------------------------------------------------------------------------------------------------------------------------------------------------------------------------------------------------------------------------------------------------------------------------------------------------------------------------------------------------------------------------------------------------------------------------------------------------------------------------------------------------------------------------------------------------------------------------------------------------------------------------------------------------------------|
| Field conditions       | Field work was conducted under average conditions and such that environmental conditions (e.g., extreme temperatures, extreme weather, extreme discharge) were not impacting the results. Water samples were taken from undisturbed and freely flowing water sources. All relevant physico-chemical information of the obtained water samples are provided directly in the supplied dataset or described in the original literature from which the already published data were obtained from. All data and references are provided in the complete dataset provided alongside the paper.                                                                                                                       |
| Location               | All sampling locations and dates are given precisely in the complete dataset provided alongside the paper.                                                                                                                                                                                                                                                                                                                                                                                                                                                                                                                                                                                                     |
| Access & import/export | Data were collected and analyzed directly on site in Japan or in laboratories in Japan (most data) or in Switzerland (only 4 water samples for high resolution dissolved noble gas isotope analysis). Access and import/export followed general local regulations and did not require any permits. For data obtained from private groundwater wells and springs, permissions from the owners were obtained prior to sampling. Detailed information on sampling, laboratory analysis and location of analysis are provided in the paper's methods section for samples obtained and analyzed by the authors in this study. Information on data obtained from literature are provided in the original literature. |
| Disturbance            | No disturbances were caused.                                                                                                                                                                                                                                                                                                                                                                                                                                                                                                                                                                                                                                                                                   |

## Reporting for specific materials, systems and methods

We require information from authors about some types of materials, experimental systems and methods used in many studies. Here, indicate whether each material, system or method listed is relevant to your study. If you are not sure if a list item applies to your research, read the appropriate section before selecting a response.

### Materials & experimental systems

| n/a                                 | Involvement in the study                               |
|-------------------------------------|--------------------------------------------------------|
| <input checked="" type="checkbox"/> | <input type="checkbox"/> Antibodies                    |
| <input checked="" type="checkbox"/> | <input type="checkbox"/> Eukaryotic cell lines         |
| <input checked="" type="checkbox"/> | <input type="checkbox"/> Palaeontology and archaeology |
| <input checked="" type="checkbox"/> | <input type="checkbox"/> Animals and other organisms   |
| <input checked="" type="checkbox"/> | <input type="checkbox"/> Clinical data                 |
| <input checked="" type="checkbox"/> | <input type="checkbox"/> Dual use research of concern  |

### Methods

| n/a                                 | Involvement in the study                        |
|-------------------------------------|-------------------------------------------------|
| <input checked="" type="checkbox"/> | <input type="checkbox"/> ChIP-seq               |
| <input checked="" type="checkbox"/> | <input type="checkbox"/> Flow cytometry         |
| <input checked="" type="checkbox"/> | <input type="checkbox"/> MRI-based neuroimaging |
